# Supplementary material for: BILAG 2004. Development and initial validation of an updated version of the British Isles Lupus Assessment Group's disease activity index for patients with systemic lupus erythematosus
Source: Oxford University Press journal article supplement (doi:10.1093/rheumatology/keh624), 2005-04-06
Supplement: keh624_Supplementary_Data.zip [file keh624_Supplementary_Data.zip]

Archive with 2 entries (2 files):
- keh624Appendix2.pdf
- keh624Appendix.pdf
