# Supplementary material for: BILAG 2004. Development and initial validation of an updated version of the British Isles Lupus Assessment Group's disease activity index for patients with systemic lupus erythematosus
Source: Oxford University Press journal article supplement (doi:10.1093/rheumatology/keh624), 2005-04-06
Supplement: keh624_Supplementary_Data.zip [file keh624_Supplementary_Data.zip]

Date of Assessment:

Date of Birth:

Name/ID:

**BILAG2004 INDEX ASSESSMENT**

Only features attributable to SLE are to be recorded and refer to the last 4 weeks compared with the previous 4 weeks.

Scoring for features: **1 Improving**  
**2 Same**  
**3 Worse**  
**4 New**  
**Yes/No (where indicated)**  
**value (where indicated)**  
☐ **indicate if feature not due to lupus**  
**(default is 0 = not present)**

**CONSTITUTIONAL**

- |                                     |   |   |
|-------------------------------------|---|---|
| 1. Pyrexia (documented)             | ( | ) |
| 2. Weight loss - unintentional > 5% | ( | ) |
| 3. Lymphadenopathy/splenomegaly     | ( | ) |
| 4. Fatigue/malaise/lethargy         | ( | ) |
| 5. Anorexia                         | ( | ) |

**MUCOCUTANEOUS**

- |                                         |   |   |
|-----------------------------------------|---|---|
| 6. Skin eruption - severe               | ( | ) |
| 7. Skin eruption - mild                 | ( | ) |
| 8. Angio-oedema                         | ( | ) |
| 9. Mucosal ulceration - severe          | ( | ) |
| 10. Mucosal ulceration - mild           | ( | ) |
| 11. Panniculitis - severe               | ( | ) |
| 12. Panniculitis - mild                 | ( | ) |
| 13. Cutaneous vasculitis/thrombosis     | ( | ) |
| 14. Digital infarcts/nodular vasculitis | ( | ) |
| 15. Alopecia - severe                   | ( | ) |
| 16. Alopecia - mild                     | ( | ) |
| 17. Peri-ungual erythema/chilblains     | ( | ) |
| 18. Splinter haemorrhages               | ( | ) |

**NEUROPSYCHIATRIC**

- |                                                             |   |   |
|-------------------------------------------------------------|---|---|
| 19. Aseptic meningitis                                      | ( | ) |
| 20. Cerebral vasculitis                                     | ( | ) |
| 21. Demyelinating syndrome                                  | ( | ) |
| 22. Myelopathy                                              | ( | ) |
| 23. Acute confusional state                                 | ( | ) |
| 24. Psychosis                                               | ( | ) |
| 25. Acute inflammatory demyelinating polyradiculoneuropathy | ( | ) |
| 26. Mononeuropathy (single/multiplex)                       | ( | ) |
| 27. Cranial neuropathy                                      | ( | ) |
| 28. Plexopathy                                              | ( | ) |
| 29. Polyneuropathy                                          | ( | ) |
| 30. Seizure disorder                                        | ( | ) |
| 31. Status epilepticus                                      | ( | ) |
| 32. Cerebrovascular disease (not due to vasculitis)         | ( | ) |
| 33. Cognitive dysfunction                                   | ( | ) |
| 34. Movement disorder                                       | ( | ) |
| 35. Autonomic disorder                                      | ( | ) |
| 36. Cerebellar ataxia                                       | ( | ) |
| 37. Headache, severe, unremitting                           | ( | ) |
| 38. Migraine with/without aura                              | ( | ) |
| 39. Tension headache                                        | ( | ) |
| 40. Cluster headache                                        | ( | ) |
| 41. Headache from IC hypertension                           | ( | ) |
| 42. Mood disorder (depression/mania)                        | ( | ) |
| 43. Anxiety disorder                                        | ( | ) |

**MUSCULOSKELETAL**

- |                                       |   |   |
|---------------------------------------|---|---|
| 44. Definite myositis (Bohan & Peter) | ( | ) |
| 45. Myositis with incomplete criteria | ( | ) |
| 46. Severe polyarthritis              | ( | ) |
| 47. Arthritis/Tendonitis              | ( | ) |
| 48. Arthralgia/Myalgia                | ( | ) |

**CARDIORESPIRATORY**

- |                                                |   |   |
|------------------------------------------------|---|---|
| 49. Myocarditis - mild                         | ( | ) |
| 50. Cardiac failure                            | ( | ) |
| 51. Arrhythmia                                 | ( | ) |
| 52. New valvular dysfunction                   | ( | ) |
| 53. Serositis (pleuro-pericardial pain) - mild | ( | ) |
| 54. Cardiac tamponade                          | ( | ) |
| 55. Pleural effusion with dyspnoea             | ( | ) |
| 56. Pulmonary haemorrhage/vasculitis           | ( | ) |
| 57. Interstitial alveolitis/pneumonitis        | ( | ) |
| 58. Shrinking lung syndrome                    | ( | ) |
| 59. Aortitis                                   | ( | ) |
| 60. Coronary vasculitis                        | ( | ) |

**GASTROINTESTINAL**

- |                                    |   |   |
|------------------------------------|---|---|
| 61. Peritonitis                    | ( | ) |
| 62. Abdominal serositis or ascites | ( | ) |
| 63. Lupus enteritis/colitis        | ( | ) |
| 64. Malabsorption                  | ( | ) |
| 65. Protein losing enteropathy     | ( | ) |
| 66. Intestinal pseudo-obstruction  | ( | ) |
| 67. Hepatitis                      | ( | ) |
| 68. Acute cholecystitis            | ( | ) |
| 69. Acute pancreatitis             | ( | ) |

**OPHTHALMIC**

- |                                                                                             |   |   |
|---------------------------------------------------------------------------------------------|---|---|
| 70. Orbital inflammation with myositis and/or extra ocular muscle swelling and/or proptosis | ( | ) |
| 71. Keratitis - severe                                                                      | ( | ) |
| 72. Keratitis - mild                                                                        | ( | ) |
| 73. Anterior uveitis                                                                        | ( | ) |
| 74. Posterior uveitis/retinal vasculitis - severe                                           | ( | ) |
| 75. Posterior uveitis/retinal vasculitis - mild                                             | ( | ) |
| 76. Episcleritis                                                                            | ( | ) |
| 77. Scleritis - severe                                                                      | ( | ) |
| 78. Scleritis - mild                                                                        | ( | ) |
| 79. Retinal/choroidal vaso-occlusive disease                                                | ( | ) |
| 80. Isolated cotton-wool spots (cytoid bodies)                                              | ( | ) |
| 81. Optic neuritis                                                                          | ( | ) |
| 82. Anterior ischaemic optic neuropathy                                                     | ( | ) |

**RENAL**

- |                                                                          |                        |   |   |                          |
|--------------------------------------------------------------------------|------------------------|---|---|--------------------------|
| 83. Systolic blood pressure (mm Hg)                                      | value                  | ( | ) | <input type="checkbox"/> |
| 84. Diastolic blood pressure (mm Hg)                                     | value                  | ( | ) | <input type="checkbox"/> |
| 85. Accelerated hypertension                                             | Yes/No                 | ( | ) | <input type="checkbox"/> |
| 86. Urine dipstick                                                       | (-0, +=1, ++=2, +++=3) | ( | ) | <input type="checkbox"/> |
| 87. Urine albumin-creatinine ratio                                       | mg/mmol                | ( | ) | <input type="checkbox"/> |
| 88. Urine protein-creatinine ratio                                       | mg/mmol                | ( | ) | <input type="checkbox"/> |
| 89. 24 hour urine protein (g)                                            | value                  | ( | ) | <input type="checkbox"/> |
| 90. Nephrotic syndrome                                                   | Yes/No                 | ( | ) | <input type="checkbox"/> |
| 91. Creatinine (plasma/serum)                                            | μmol/l                 | ( | ) | <input type="checkbox"/> |
| 92. GFR (calculated)                                                     | ml/min                 | ( | ) | <input type="checkbox"/> |
| 93. Active urinary sediment                                              | Yes/No                 | ( | ) | <input type="checkbox"/> |
| 94. Histological evidence of active nephritis (within 3 months) (Yes/No) |                        | ( | ) | <input type="checkbox"/> |

**HAEMATOLOGY**

- |                                                   |        |   |   |                          |
|---------------------------------------------------|--------|---|---|--------------------------|
| 95. Haemoglobin (g/dl)                            | value  | ( | ) | <input type="checkbox"/> |
| 96. Total white cell count (x 10 <sup>9</sup> /l) | value  | ( | ) | <input type="checkbox"/> |
| 97. Neutrophils (x 10 <sup>9</sup> /l)            | value  | ( | ) | <input type="checkbox"/> |
| 98. Lymphocytes (x 10 <sup>9</sup> /l)            | value  | ( | ) | <input type="checkbox"/> |
| 99. Platelets (x 10 <sup>9</sup> /l)              | value  | ( | ) | <input type="checkbox"/> |
| 100. Evidence of active haemolysis                | Yes/No | ( | ) | <input type="checkbox"/> |
| 101. Coombs' test positive (isolated)             | Yes/No | ( | ) | <input type="checkbox"/> |

Revision: 12/Apr/2004

Weight (kg):

Black (Yes/No):

Serum urea (mmol/l):

Serum albumin (g/dl):
