# Supplementary material for: BILAG 2004. Development and initial validation of an updated version of the British Isles Lupus Assessment Group's disease activity index for patients with systemic lupus erythematosus
Source: Oxford University Press journal article supplement (doi:10.1093/rheumatology/keh624), 2005-04-06
Supplement: keh624_Supplementary_Data.zip [file keh624_Supplementary_Data.zip › keh624Appendix2.pdf]

## **BILAG2004 INDEX GLOSSARY**

- all features must be attributable to SLE and refer to the last 4 weeks compared with the previous 4 weeks
- in some manifestations, it may be difficult to differentiate SLE from other causes as there may not be any specific test and the decision would then lie with the physician's judgement on the balance of probabilities
- definition of improvement: (a) the amount of improvement is sufficient for consideration of reduction in therapy  
(b) improvement must be present  $\geq 2$  weeks of the previous 4 weeks
- most are self-explanatory but definitions are available for most descriptors
- ophthalmic manifestations need to be assessed by ophthalmologist
- for descriptors that are based on measurements (in renal and haematology systems), it is important to indicate if these are not due to lupus (for consideration of scoring) as they are usually recorded routinely into a database

### **CONSTITUTIONAL**

- |                                      |                                                 |
|--------------------------------------|-------------------------------------------------|
| 1. Pyrexia                           | temperature $> 37.5^{\circ}\text{C}$ documented |
| 2. Unintentional weight loss $> 5\%$ |                                                 |
| 3. Lymphadenopathy                   | palpable lymph node more than 1 cm diameter     |
| 4. Fatigue or malaise or lethargy    |                                                 |
| 5. Anorexia                          |                                                 |

### **MUCOCUTANEOUS**

- |                    |                                                                                                                                                |
|--------------------|------------------------------------------------------------------------------------------------------------------------------------------------|
| 6. Severe eruption | $> 18\%$ body surface area or bullous<br>includes discoid lesion                                                                               |
|                    | body surface area (BSA) is defined using the<br>rules of nines (used to assess extent of burns) as<br>follows:                                 |
|                    | palm(excluding fingers) = 1% BSA<br>each lower limb = 18% BSA<br>each upper limb = 9% BSA<br>torso (front) = 18% BSA<br>torso (back) = 18% BSA |

head = 9% BSA  
genital (male) = 1% BSA

- |                                        |                                                                                                                           |
|----------------------------------------|---------------------------------------------------------------------------------------------------------------------------|
| 7. Mild eruption                       | ≤ 18% body surface area<br>includes discoid lesion                                                                        |
| 8. Angio-oedema                        | potentially life-threatening eg: stridor                                                                                  |
| 9. Severe mucosal ulceration           | disabling extensive &/or deep ulceration                                                                                  |
| 10. Mild mucosal ulceration            | localised non-disabling ulceration                                                                                        |
| 11. Severe panniculitis                | any one:<br>affecting the face<br>> 9% body surface area<br>threatens integrity of epithelium &/or<br>subcutaneous tissue |
| 12. Mild panniculitis                  | ≤ 9% body surface area and does not fulfil any<br>criteria for severe panniculitis                                        |
| 13. Cutaneous vasculitis/thrombosis    | resulting in gangrene or ulceration or skin<br>infarction                                                                 |
| 14. Digital infarct/nodular vasculitis | localised single or multiple infarct(s) over<br>digit(s) or tender erythematous nodule(s)                                 |
| 15. Severe alopecia                    | clinically detectable diffuse or patchy hair loss<br>with scalp inflammation                                              |
| 16. Mild alopecia                      | not clinically detectable and little/no scalp<br>inflammation (may be diffuse & must be<br>spontaneous)                   |
| 17. Peri-ungual erythema or chilblains |                                                                                                                           |
| 18. Splinter haemorrhages              |                                                                                                                           |

## **NEUROPSYCHIATRIC**

- |                        |                                                                                                                                                                                                                                       |
|------------------------|---------------------------------------------------------------------------------------------------------------------------------------------------------------------------------------------------------------------------------------|
| 19. Aseptic meningitis | criteria (all): acute/subacute onset<br>headache<br>photophobia<br>neck stiffness<br>fever<br>signs of meningeal irritation<br>abnormal CSF but negative cultures<br><br>exclude CNS/meningeal infection, intracranial<br>haemorrhage |
|------------------------|---------------------------------------------------------------------------------------------------------------------------------------------------------------------------------------------------------------------------------------|

|                                                             |                                                                                                                                                                                                                    |
|-------------------------------------------------------------|--------------------------------------------------------------------------------------------------------------------------------------------------------------------------------------------------------------------|
| 20. Cerebral vasculitis                                     | should be present with features of vasculitis in another system and supportive imaging &/or biopsy findings                                                                                                        |
| 21. Demyelinating syndrome                                  | discrete white matter lesion with associated neurological deficit not recorded elsewhere<br><br>there must have been at least one previously recorded event<br><br>exclude multiple sclerosis                      |
| 22. Myelopathy                                              | acute onset of rapidly evolving paraparesis or quadriparesis and/or sensory level<br><br>exclude intramedullary and extramedullary space occupying lesion                                                          |
| 23. Acute confusional state                                 | acute disturbance of consciousness or level of arousal with reduced ability to focus, maintain or shift attention<br><br>includes hypo- and hyperaroused states and encompasses the spectrum from delirium to coma |
| 24. Psychosis                                               | delusion or hallucinations<br><br>does not occur exclusively during course of a delirium<br><br>exclude drugs, substance abuse, primary psychotic disorder                                                         |
| 25. Acute inflammatory demyelinating polyradiculoneuropathy | criteria:<br>progressive polyradiculoneuropathy<br>loss of reflexes<br>symmetrical involvement<br>increased CSF protein without pleocytosis<br>supportive abnormal nerve conduction study                          |
| 26. Mononeuropathy (single/multiplex)                       | nerve conduction study not essential                                                                                                                                                                               |
| 27. Cranial neuropathy                                      | except optic neuropathy which is classified elsewhere                                                                                                                                                              |
| 28. Plexopathy                                              | disorder of brachial or lumbosacral plexus resulting in neurological deficit not corresponding to territory of single root or nerve                                                                                |

|                                                        |                                                                                                                                                                                                                                                                                                                                                                                                                                                                                                          |
|--------------------------------------------------------|----------------------------------------------------------------------------------------------------------------------------------------------------------------------------------------------------------------------------------------------------------------------------------------------------------------------------------------------------------------------------------------------------------------------------------------------------------------------------------------------------------|
|                                                        | positive electrophysiology study required                                                                                                                                                                                                                                                                                                                                                                                                                                                                |
| 29. Polyneuropathy                                     | <p>symmetrical distal sensory and/or motor deficit</p> <p>positive electrophysiology study required</p>                                                                                                                                                                                                                                                                                                                                                                                                  |
| 30. Seizure disorder                                   | independent description of seizure by reliable witness                                                                                                                                                                                                                                                                                                                                                                                                                                                   |
| 31. Status epilepticus                                 | a seizure or series of seizures lasting $\geq 30$ minutes without full recovery to baseline                                                                                                                                                                                                                                                                                                                                                                                                              |
| 32. Cerebrovascular disease<br>(not due to vasculitis) | <p>any one with supporting imaging:</p> <ul style="list-style-type: none"> <li>stroke syndrome</li> <li>transient ischaemic attack</li> <li>intracranial haemorrhage</li> </ul> <p>exclude hypoglycaemia, cerebral sinus thrombosis, vascular malformation, tumour, abscess</p> <p>cerebral sinus thrombosis not included as definite thrombosis not considered part of lupus activity</p>                                                                                                               |
| 33. Cognitive dysfunction                              | <p>significant deficits in any cognitive functions:</p> <ul style="list-style-type: none"> <li>simple attention</li> <li>complex attention</li> <li>memory</li> <li>visual-spatial processing</li> <li>language</li> <li>reasoning/problem solving</li> <li>psychomotor speed</li> <li>executive functions</li> </ul> <p>neuropsychological testing should be done if possible or corroborating history from third party that it is interfering with daily activities</p> <p>exclude substance abuse</p> |
| 34. Movement disorder                                  | exclude drugs                                                                                                                                                                                                                                                                                                                                                                                                                                                                                            |
| 35. Autonomic disorder                                 | <p>any one:</p> <ul style="list-style-type: none"> <li>fall in blood pressure to standing <math>&gt; 30/15</math> mm Hg (systolic/diastolic)</li> <li>increase in heart rate to standing <math>\geq 30</math> bpm</li> </ul>                                                                                                                                                                                                                                                                             |

|                                      |                                                                                                                                                                                                      |
|--------------------------------------|------------------------------------------------------------------------------------------------------------------------------------------------------------------------------------------------------|
|                                      | loss of heart rate variation with respiration<br>(max – min < 15 bpm, expiration:inspiration<br>ratio < 1.2, Valsalva ratio < 1.4)                                                                   |
|                                      | loss of sweating over body and limbs<br>(anhidrosis) by sweat test                                                                                                                                   |
|                                      | exclude drugs and diabetes mellitus                                                                                                                                                                  |
| 36. Cerebellar ataxia                |                                                                                                                                                                                                      |
| 37. Severe headache (unremitting)    | disabling headache unresponsive to narcotic<br>analgesia & lasting $\geq 3$ days                                                                                                                     |
|                                      | exclude intracranical space occupying lesion<br>and CNS infection                                                                                                                                    |
| 38. Migraine with/without aura       | recurrent attacks of headache lasting 4 - 72<br>hours                                                                                                                                                |
|                                      | may be preceded by neurological aura (lasting<br>up to 1 hour)                                                                                                                                       |
| 39. Tension headache                 | recurrent episodes of headaches lasting minutes<br>to days                                                                                                                                           |
| 40. Cluster headache                 | attacks of severe unilateral headache lasting 15<br>- 180 minutes                                                                                                                                    |
|                                      | attacks at least once every other day and up to 8<br>times a day                                                                                                                                     |
|                                      | attacks occur in clusters (series of weeks or<br>months) separated by remissions of usually<br>months or years                                                                                       |
| 41. Headache from IC hypertension    | exclude cerebral sinus thrombosis                                                                                                                                                                    |
| 42. Mood disorder (depression/mania) | prominent & persistent disturbance in mood<br>characterised by depressed mood or markedly<br>diminished interest or pleasure in almost all<br>activities or elevated, expansive or irritable<br>mood |
|                                      | should result in significant distress or impaired<br>functioning                                                                                                                                     |
| 43. Anxiety disorder                 | prominent anxiety, panic disorder, panic attacks<br>or obsessions or compulsions resulting in<br>clinically significant distress or impaired<br>functioning                                          |

## **MUSCULOSKELETAL**

- |                             |                                                                                                                                                                                   |
|-----------------------------|-----------------------------------------------------------------------------------------------------------------------------------------------------------------------------------|
| 44. Definite myositis       | ≥ 3 Bohan & Peter criteria:<br>proximal muscle weakness<br>elevated muscle enzymes<br>positive muscle biopsy<br>abnormal EMG                                                      |
| 45. Incomplete myositis     | 2 Bohan & Peter criteria                                                                                                                                                          |
| 46. Severe polyarthritis    | observed active synovitis ≥ 2 joints with<br>significant impairment of activities of daily<br>living and has been present on several days<br>(cumulatively) over the last 4 weeks |
| 47. Arthritis or Tendonitis | tendonitis or active synovitis ≥ 1 joint with some<br>impairment of function, which has been present<br>on several days over the last 4 weeks                                     |
| 48. Arthralgia or Myalgia   | inflammatory joint or muscle pain which does<br>not fulfil the above criteria for arthritis or<br>myositis                                                                        |

## **CARDIORESPIRATORY**

- |                                              |                                                                                                                                                            |
|----------------------------------------------|------------------------------------------------------------------------------------------------------------------------------------------------------------|
| 49. Mild myocarditis                         | inflammation of myocardium with raised<br>cardiac enzymes &/or ECG changes and without<br>resulting cardiac failure, arrhythmia or valvular<br>dysfunction |
| 50. Cardiac failure                          | cardiac failure due to myocarditis or non-<br>infective inflammation of endocardium or<br>cardiac valves (endocarditis)                                    |
| 51. Arrhythmia                               | arrhythmia (except sinus tachycardia) due to<br>myocarditis or non-infective inflammation of<br>endocardium or cardiac valves (endocarditis)               |
| 52. New valvular dysfunction                 | new cardiac valvular dysfunction due to<br>myocarditis or non-infective inflammation of<br>endocardium or cardiac valves (endocarditis)                    |
| 53. Mild serositis (pleuro-pericardial pain) | in absence of cardiac tamponade or pleural<br>effusion with dyspnoea                                                                                       |

|                                         |                                                                                                                                    |
|-----------------------------------------|------------------------------------------------------------------------------------------------------------------------------------|
| 54. Cardiac tamponade                   |                                                                                                                                    |
| 55. Pleural effusion with dyspnoea      |                                                                                                                                    |
| 56. Pulmonary haemorrhage/vasculitis    | inflammation of pulmonary vasculature with haemoptysis &/or dyspnoea &/or pulmonary hypertension                                   |
|                                         | supporting imaging &/or histological diagnosis                                                                                     |
| 57. Interstitial alveolitis/pneumonitis | radiological features of alveolar infiltration not due to infection or haemorrhage                                                 |
|                                         | reduced corrected gas transfer Kco (< 70% normal)                                                                                  |
| 58. Shrinking lung syndrome             | reduced lung volumes (< 70% predicted) in presence of normal corrected gas transfer Kco with dysfunctional diaphragmatic movements |
| 59. Aortitis                            | inflammation of aorta with or without dissection with supporting imaging abnormalities                                             |
|                                         | accompanied by > 10 mm Hg difference in BP between arms &/or claudication of extremities &/or vascular bruits                      |
| 60. Coronary vasculitis                 | inflammation of coronary vessels with radiographic evidence of non-atheromatous narrowing, obstruction or aneurismal changes       |

## **GASTROINTESTINAL**

|                                |                                                                                                                                                                                 |
|--------------------------------|---------------------------------------------------------------------------------------------------------------------------------------------------------------------------------|
| 61. Peritonitis                | serositis presenting as acute abdomen with rebound/guarding                                                                                                                     |
| 62. Serositis                  | not presenting as acute abdomen                                                                                                                                                 |
| 63. Lupus enteritis or colitis | vasculitis or inflammation of small or large bowel with supportive imaging &/or biopsy findings                                                                                 |
| 64. Malabsorption              | diarrhoea with abnormal D- xylose absorption test or increased faecal fat excretion after exclusion of coeliac's disease (poor response to gluten-free diet) and gut vasculitis |
| 65. Protein-losing enteropathy | diarrhoea with hypoalbuminaemia or increased fecal excretion of iv radiolabeled albumin after exclusion of gut vasculitis                                                       |

|                                   |                                                                                                                                                                                      |
|-----------------------------------|--------------------------------------------------------------------------------------------------------------------------------------------------------------------------------------|
| 66. Intestinal pseudo-obstruction | subacute intestinal obstruction due to intestinal hypomotility                                                                                                                       |
| 67. Hepatitis                     | raised transaminases in absence of autoantibodies specific to autoimmune hepatitis (eg: anti-smooth muscle, anti-liver cytosol 1) &/or biopsy appearance of chronic active hepatitis |
| 68. Acute cholecystitis           | after exclusion of gallstones and infection                                                                                                                                          |
| 69. Acute pancreatitis            | usually associated multisystem involvement                                                                                                                                           |

### **OPHTHALMIC**

|                                                      |                                                                                                                                                     |
|------------------------------------------------------|-----------------------------------------------------------------------------------------------------------------------------------------------------|
| 70. Orbital inflammation                             |                                                                                                                                                     |
| 71. Severe keratitis                                 | sight threatening<br>includes: corneal melt<br>peripheral ulcerative keratitis                                                                      |
| 72. Mild keratitis                                   | not sight threatening                                                                                                                               |
| 73. Anterior uveitis                                 |                                                                                                                                                     |
| 74. Severe posterior uveitis &/or retinal vasculitis | sight-threatening &/or retinal vasculitis<br>not due to vaso-occlusive disease                                                                      |
| 75. Mild posterior uveitis &/or retinal vasculitis   | not sight-threatening<br><br>not due to vaso-occlusive disease                                                                                      |
| 76. Episcleritis                                     |                                                                                                                                                     |
| 77. Severe scleritis                                 | necrotising anterior scleritis<br><br>anterior &/or posterior scleritis requiring systemic steroids/immunosuppression &/or not responding to NSAIDs |
| 78. Mild scleritis                                   | anterior &/or posterior scleritis not requiring systemic steroids<br><br>excludes necrotising anterior scleritis                                    |
| 79. Retinal/choroidal vaso-occlusive disease         | includes: retinal arterial & venous occlusion<br>serous retinal &/or retinal pigment epithelial detachments secondary to choroidal vasculopathy     |
| 80. Isolated cotton-wool spots                       | also known as cytoid bodies                                                                                                                         |

- |                                         |                                                                                         |
|-----------------------------------------|-----------------------------------------------------------------------------------------|
| 81. Optic neuritis                      | excludes anterior ischaemic optic neuropathy                                            |
| 82. Anterior ischaemic optic neuropathy | visual loss with pale swollen optic disc due to occlusion of posterior ciliary arteries |

## **RENAL**

- |                                    |                                                                                                                                                                                                                                                                                                                                                                                                                                              |
|------------------------------------|----------------------------------------------------------------------------------------------------------------------------------------------------------------------------------------------------------------------------------------------------------------------------------------------------------------------------------------------------------------------------------------------------------------------------------------------|
| 83. Systolic blood pressure        |                                                                                                                                                                                                                                                                                                                                                                                                                                              |
| 84. Diastolic blood pressure       |                                                                                                                                                                                                                                                                                                                                                                                                                                              |
| 85. Accelerated hypertension       | blood pressure rising to > 170/110 mm Hg within 1 month with grade 3 or 4 Keith-Wagener-Barker retinal changes (flame-shaped haemorrhages or cotton-wool spots or papilloedema)                                                                                                                                                                                                                                                              |
| 86. Urine dipstick                 |                                                                                                                                                                                                                                                                                                                                                                                                                                              |
| 87. Urine albumin-creatinine ratio | on freshly voided urine sample                                                                                                                                                                                                                                                                                                                                                                                                               |
| 88. Urine protein-creatinine ratio | on freshly voided urine sample                                                                                                                                                                                                                                                                                                                                                                                                               |
| 89. 24 hour urine protein          |                                                                                                                                                                                                                                                                                                                                                                                                                                              |
| 90. Nephrotic syndrome             | criteria:<br>heavy proteinuria (> 50 mg/kg/day or > 3.5 g/day or protein-creatinine ratio > 350 mg/mmol or albumin-creatinine ratio > 350 mg/mmol)<br><br>hypoalbuminaemia<br>oedema                                                                                                                                                                                                                                                         |
| 91. Plasma/Serum creatinine        |                                                                                                                                                                                                                                                                                                                                                                                                                                              |
| 92. GFR                            | MDRD formula:<br>$\text{GFR} = 170 \times [\text{serum creatinine(mg/dl)}]^{-0.999} \times [\text{age}]^{-0.176} \times [\text{serum urea(mg/dl)}]^{-0.17} \times [\text{serum albumin(g/dl)}]^{0.318} \times [0.762 \text{ if female}] \times [1.180 \text{ if black}]$<br>conversion:<br>serum creatinine - mg/dl = (μmol/l)/88.5<br>serum urea - mg/dl = (mmol/l) x 2.8<br><br>creatinine clearance not recommended as it is not reliable |
| 93. Active urinary sediment        | Uncentrifuged specimen: pyuria (> 5 WCC/hpf), haematuria (> 5 RBC/hpf) or red cell casts in absence of other causes                                                                                                                                                                                                                                                                                                                          |
| 94. Histology of active nephritis  | WHO Class III, IV or V                                                                                                                                                                                                                                                                                                                                                                                                                       |

within last 3 months or since previous assessments if seen less than 3 months ago

glomerular sclerosis without inflammation not counted

## **HAEMATOLOGY**

95. Haemoglobin

96. White cell count

97. Neutrophil count

98. Lymphocyte count

99. Platelet count

100. Evidence of active haemolysis

positive Coomb's test & evidence of haemolysis (raised bilirubin or raised reticulocyte count or reduced haptoglobulins)

101. Isolated positive Coomb's test

## **ADDITIONAL ITEMS**

These items are required mainly for calculation of GFR

i. Date of Birth

ii. Weight

iii. Black

iv. Serum urea

v. Serum albumin
